# Supplementary material for: Effects of Forest Fragmentation on Connectivity and Genetic Diversity in an Endemic and an Invasive Rodent in Northwestern Madagascar
Source: Preprints.org preprint supplement (doi:10.20944/preprints202306.0526.v1), 2023-06-07
Supplement: Supplementary file 1 [file supplementary]

## Sheet: Sheet1
Species	K	Overall	ANP	MCF
E. myoxinus	1	0.56351	0.614642	0.913059
	2	0.56811	0.635672	1.14861
	3	0.578265	0.665722	1.95262
	4	0.593804	0.718794	2.59006
	5	0.610746	0.74683	3.3523
	6	0.630502	0.791474	4.0641
	7	0.643962	0.836843	4.73314
	8	0.672565	0.907159	5.11333
	9	0.692575	0.9754	5.17847
	10	0.72118	1.03788	4.91819
R. rattus	1	0.59443	0.666481	0.700703
	2	0.595667	0.757295	0.802572
	3	0.63138	0.898824	0.934652
	4	0.674737	1.05888	1.06691
	5	0.723667	1.22166	1.24856
	6	0.769678	1.39117	1.3992
	7	0.821793	1.54207	1.58263
	8	0.883732	1.6933	1.79402
	9	0.943625	1.83057	1.95285
	10	1.01117	2.01935	2.13401
