# Supplementary material for: Effects of Forest Fragmentation on Connectivity and Genetic Diversity in an Endemic and an Invasive Rodent in Northwestern Madagascar
Source: Preprints.org preprint supplement (doi:10.20944/preprints202306.0526.v1), 2023-06-07
Supplement: Supplementary file 2 [file S1 Table.xlsx]

## Sheet: Sheet1
Site	Location	GPS X	GPS Y	Distance to Continuous Forest	Forest Area	Percentage Edge	E. myoxinus	R. rattus
3FS	ANP	-16.3273	46.6929	978	114.6	0.38	0	5
3FN	ANP	-16.3177	46.7112	978	114.6	0.38	6	4
5F	ANP	-16.3241	46.6906	1245	15.39	0.67	4	3
4F	ANP	-16.3141	46.7047	1350	18.5	0.45	1	0
14SF	MCF	-15.3757	46.7408	281	14.6	0.5	0	2
1FN	ANP	-16.3057	46.6982	2228	37	0.5	2	1
1FS	ANP	-16.3104	46.7154	2228	37	0.5	3	2
31F	ANP	-16.2976	46.6898	1220	17.8	0.52	2	2
6F	ANP	-16.3224	46.7156	213	11.53	0.57	4	1
2FS	ANP	-16.3041	46.71	724	47.7	0.62	1	0
8SF	MCF	-15.5236	46.7284	510	7.2	0.63	0	5
9F	ANP	-16.3272	46.7144	145	14.9	0.69	4	3
8F	ANP	-16.3287	46.6997	1152	13.8	0.69	3	4
13SF	MCF	-15.3722	46.781	258	6.6	0.7	2	0
15SF	MCF	-15.3624	46.7446	169	16.15	0.72	0	2
12aF	ANP	-16.3034	46.7235	690	14.2	0.77	3	0
RIVFW	MCF	-15.5062	46.6943	0	86.7	0.81	0	1
RIVH	MCF	-15.5078	46.6896	0	86.7	0.81	0	2
12SF	MCF	-15.3756	46.7819	211	3.7	0.83	2	1
6SF	MCF	-15.5321	46.7297	410	9.4	0.9	0	1
7F	ANP	-16.3291	46.6965	1396	3.53	0.93	0	2
5SF	MCF	-15.5311	46.7274	890	3.04	0.96	0	2
10F	ANP	-16.3407	46.7109	114	2.72	1	0	2
20F	ANP	-16.3167	46.7182	195	1.47	1	1	0
38F	ANP	-16.2935	46.7036	1030	1.07	1	1	1
19F	ANP	-16.3262	46.7038	1076	1.4	1	3	2
15F	ANP	-16.3105	46.6974	2500	1.2	1	2	2
C4A	MCF	-15.5087	46.7257	0	4240	NA	1	2
C4B	MCF	-15.5055	46.7248	0	4240	NA	2	5
C5A	MCF	-15.4723	46.6946	0	4240	NA	1	0
C7	MCF	-15.3778	46.7518	0	5852	NA	1	0
C6A	MCF	-15.382	46.7822	0	5852	NA	3	0
C20A	ANP	-16.3225	46.7229	0	130390	NA	4	2
C20B	ANP	-16.3229	46.7238	0	130390	NA	1	0
C35	ANP	-16.2831	46.6991	0	130390	NA	1	0
C9A	ANP	-16.3289	46.7209	0	130390	NA	0	5
C9B	ANP	-16.3305	46.7248	0	130390	NA	2	1
C6B	MCF	-15.3855	46.785	0	5852	NA	0	3
Other	ANP	NA	NA	NA	NA	NA	10	1
Other	MCF	NA	NA	NA	NA	NA	2	12
