# Supplementary material for: Effects of Forest Fragmentation on Connectivity and Genetic Diversity in an Endemic and an Invasive Rodent in Northwestern Madagascar
Source: Preprints.org preprint supplement (doi:10.20944/preprints202306.0526.v1), 2023-06-07
Supplement: Supplementary file 5 [file S4 Table.xlsx]

## Sheet: S3 Table
Dataset	Variables	rs	P-value	N
all (Model A, B)	Body mass ~ Distance to Edge	0.06	0.51	123
all (Model A, B)	Body mass ~ Forest Area	0.08	0.48	123
all (Model A, B)	Forest Area ~ Distance to Edge	0.704	< 0.001	123
fragment (Model C, D, E)	Body mass ~ Edge Percentage	-0.08	0.55	90
fragment (Model C, D, E)	Body mass ~ Forest Area	0.01	0.93	90
fragment (Model C, D, E)	Distance to Continuous Forest ~ Body Mass	0.06	0.65	90
fragment (Model C, D, E)	Distance to Continuous Forest ~ Distance to Edge	0.05	0.74	90
fragment (Model C, D, E)	Distance to Continuous Forest ~ Edge Percentage	0.19	0.19	90
fragment (Model C, D, E)	Distance to Continuous Forest ~ Forest Area	0.21	0.16	90
fragment (Model C, D, E)	Distance to Edge ~ Body mass	0.02	0.84	90
fragment (Model C, D, E)	Distance to Edge ~ Edge Percentage	0.67	< 0.001	90
fragment (Model C, D, E)	Forest Area ~ Distance to Edge	0.55	< 0.001	90
fragment (Model C, D, E)	Forest Area ~ Edge Percentage	-0.94	< 0.001	90

## Sheet: Source
Effects of forest fragmentation on connectivity and genetic diversity in an endemic and an invasive rodent in northwestern Madagascar
Malcolm S. Ramsay1,2*, Gabriele Sgarlata3, Christopher D. Barratt4, Jordi Salmona5, Bertrand Andriatsitohaina6,2, Frederik Kiene2, Sophie Manzi5, Miarisoa L. Ramilison7, Romule Rakotondravony7, Lounès Chikhi8,3, Shawn M. Lehman1, Ute Radespiel2*
1 Department of Anthropology, University of Toronto, Toronto, ON, Canada
2 Institute of Zoology, University of Veterinary Medicine Hannover, Foundation, Hannover, Germany
3 Instituto Gulbenkian de Ciência, Oeiras, Portugal
4 German Centre for Integrative Biodiversity Research (iDiv) Halle-Jena-Leipzig, Leipzig, Germany
5 CNRS-UPS-IRD, UMR5174, Laboratoire Évolution & Diversité Biologique, Université Paul Sabatier, Toulouse, France
6 Ecole Doctorale Ecosystèmes Naturels (EDEN), University of Mahajanga, Mahajanga, Madagascar
7 Faculté des Sciences, de Technologies et de l’Environnement, Université de Mahajanga, Mahajanga, Madagascar
S3 Table. Results of Spearman Rank correlation test between all continuous predictor variables used for modeling of the complete dataset (all) and the fragment dataset. rs: Spearman rank correlation coefficient, N: sample size, in bold: p < 0.05
