# Supplementary material for: Effects of Forest Fragmentation on Connectivity and Genetic Diversity in an Endemic and an Invasive Rodent in Northwestern Madagascar
Source: Preprints.org preprint supplement (doi:10.20944/preprints202306.0526.v1), 2023-06-07
Supplement: Supplementary file 6 [file S5 Table.xlsx]

## Sheet: Overall
							intercept		region		species		hostsex		loghostweight		logarea
FIS-A	df	logLik	AICc	ΔAICc	ω	k	E	P-value	E	P-value	E	P-value	E	P-value	E	P-value	E	P-value
	3	272.46	-536.6	0	0.516	2	1.05859	2e-16	0.023384	2.72e-05	-0.031394	3.5e-09
	5	272.981	-535.4	1.13	0.293	3	1.05546	2e-16	0.0227021	5.1e-05	-0.0313649	3.67e-09					0.0007052	0.316
	4	272.547	-534.6	2	0.19	3	1.05922	2e-16	0.023302	3.11e-05	-0.030869	1.72e-08	-0.002082	0.681
							Factor	E	SE	t-value	P-value
							(Intercept)	1.05859	0.003682	287.537	2e-16
							regionMARI	0.023384	0.005358	4.364	2.72e-05
							speciesrattus	-0.031394	0.004922	-6.378	3.5e-09
							intercept		region		species		hostsex		loghostweight		logdistedge		category
FIS-B	df	logLik	AICc	ΔAICc	ω	k	E	P-value	E	P-value	E	P-value	E	P-value	E	P-value	E	P-value	E	P-value
	5	274.469	-538.4	0	0.464	3	1.04046	2e-16	0.020927	0.000192	-0.031259	2.8e-09					0.004255	0.049113
	3	272.46	-536.6	1.84	0.184	2	1.05859	2e-16	0.023384	2.72e-05	-0.031394	3.5e-09
	5	274.605	-536.5	1.94	0.176	4	1.04101	2e-16	0.020796	0.000222	-0.030611	1.57e-08	-0.002561	0.609611			0.004308	0.047363
	6	274.602	-536.5	1.94	0.176	4	1.03369	2e-16	0.021608	0.000194	-0.031374	2.91e-09					0.005139	0.065772	0.003722	0.613492
							Factor	E	SE	t-value	P-value
							(Intercept)	1.04046	0.009819	105.963	2e-16
							logdistEDGE	0.004255	0.00214	1.988	0.049113
							regionMARI	0.020927	0.005436	3.85	0.000192
							speciesrattus	-0.031259	0.004863	-6.427	2.8e-09
							intercept		region		species		hostsex		loghostweight		logarea
FIS-C	df	logLik	AICc	ΔAICc	ω	k	E	P-value	E	P-value	E	P-value	E	P-value	E	P-value	E	P-value
	3	193.956	-379.4	0	0.495	2	1.05604	2e-16	0.0164	0.0352	-0.025937	7.98e-05
	4	194.644	-378.6	0.87	0.32	3	1.04809	2e-16	0.017756	0.0243	-0.02635	6.31e-05					0.002847	0.2531
	5	194.095	-377.5	1.97	0.185	3	1.05704	2e-16	0.016281	0.037446	-0.025096	0.000218	-0.003247	0.607646
							Factor	E	SE	t-value	P-value
							(Intercept)	1.05604	0.004408	239.589	2e-16
							regionMARI	0.0164	0.007667	2.139	0.0352
							speciesrattus	-0.025937	0.006264	-4.141	7.98e-05
							intercept		region		species		hostsex		loghostweight		distedge
FIS-D	df	logLik	AICc	ΔAICc	ω	k	E	P-value	E	P-value	E	P-value	E	P-value	E	P-value	E	P-value
	5	195.295	-379.9	0	0.442	3	1.04178	2e-16	0.016764	0.0301	-0.025573	8.77e-05					0.0018	0.1107
	3	193.956	-379.4	0.43	0.356	2	1.05604	2e-16	0.0164	0.0352	-0.025937	7.98e-05
	6	195.664	-378.3	1.56	0.202	4	1.042	2e-16	0.016606	0.031997	-0.024165	0.000324	-0.005296	0.405787			0.001977	0.086133
							Factor	E	SE	t-value	P-value
							(Intercept)	1.04178	0.009868	105.575	2e-16
							regionMARI	0.016764	0.007601	2.206	0.0301
							speciesrattus	-0.025573	0.006211	-4.117	8.77e-05
							sqrtdistEDGE	0.0018	0.001117	1.612	0.1107
							intercept		region		species		hostsex		loghostweight		edgepercent		distCONT
FIS-E	df	logLik	AICc	ΔAICc	ω	k	E	P-value	E	P-value	E	P-value	E	P-value	E	P-value	E	P-value	E	P-value
	5	195.418	-380.1	0	0.291	3	1.0409	2e-16	0.023972	0.00793	-0.026422	5.24e-05							0.0004854	0.0956
	5	196.521	-380	0.09	0.278	4	1.06912	2e-16	0.0261603	0.00419	-0.0267232	4.03e-05					-0.0345473	0.15009	0.000463	0.10996
	4	195.161	-379.6	0.51	0.225	3	1.08521	2e-16	0.01909	0.0166	-0.02628	5.92e-05					-0.03662	0.1304
	3	193.956	-379.4	0.68	0.207	2	1.05604	2e-16	0.0164	0.0352	-0.025937	7.98e-05
							Factor	E	SE	t-value	P-value
							(Intercept)	1.0409	0.0099889	104.205	2e-16
							regionMARI	0.023972	0.008818	2.719	0.00793
							speciesrattus	-0.026422	0.0062052	-4.258	5.24e-05
							sqrtdistCONT	0.0004854	0.000288	1.685	0.0956
							intercept		region		species		hostsex		loghostweight		logarea
HO-A	df	logLik	AICc	ΔAICc	ω	k	E	P-value	E	P-value	E	P-value	E	P-value	E	P-value	E	P-value
	3	421.207	-836.2	0	0.457	1	1.10651	<2e-16			0.027134	<2e-16
	4	422.021	-835.7	0.51	0.354	2	1.10596	<2e-16			0.02667	<2e-16	0.001888	0.209
	3	421.391	-834.4	1.77	0.189	2	1.10631	<2e-16	0.0009557	0.551	0.0269637	<2e-16
							Factor	E	SE	t-value	P-value
						1	(Intercept)	1.10651	0.001043	1060.64	<2e-16
							speciesrattus	0.027134	0.001435	18.91	<2e-16
							intercept		region		species		hostsex		loghostweight		logdistedge		category
HO-B	df	logLik	AICc	ΔAICc	ω	k	E	P-value	E	P-value	E	P-value	E	P-value	E	P-value	E	P-value	E	P-value
	3	421.207	-836.2	0	0.142	1	1.10651	<2e-16			0.027134	<2e-16
	6	424.464	-836.2	0.01	0.142	4	1.11631	<2e-16			0.0266518	<2e-16	0.0021912	0.1422			-0.0017527	0.0349	-0.0037297	0.0809
	5	423.336	-836.2	0.05	0.139	3	1.11629	<2e-16			0.027187	<2e-16					-0.0016476	0.0473	-0.0034533	0.1061
	4	422.021	-835.7	0.51	0.11	2	1.10596	<2e-16			0.02667	<2e-16	0.001888	0.209
	3	421.981	-835.6	0.59	0.106	2	1.10989	<2e-16			0.0271882	<2e-16					-0.0007709	0.22
	4	422.869	-835.2	0.99	0.087	4	1.10945	<2e-16			0.0267093	<2e-16	0.0019606	0.191			-0.0008022	0.201
	3	421.391	-834.4	1.77	0.059	2	1.10631	<2e-16	0.0009557	0.551	0.0269637	<2e-16
	7	424.639	-834.3	1.91	0.055	5	1.11593	<2e-16	0.0009625	0.5646	0.0264813	<2e-16	0.002214	0.1394			-0.0017634	0.0344	-0.0034308	0.1193
	4	422.402	-834.3	1.92	0.054	3	1.11016	<2e-16	0.0014773	0.367	0.026935	<2e-16					-0.0009032	0.163
	4	421.295	-834.3	1.96	0.053	2	1.10701	<2e-16			0.0271213	<2e-16							-0.0006706	0.68
	6	423.486	-834.2	1.97	0.053	4	1.11593	<2e-16	0.0008966	0.5933	0.0270334	<2e-16					-0.0016565	0.0469	-0.0031722	0.1503
							Factor	E	SE	t-value	P-value
							(Intercept)	1.10651	0.001043	1060.64	<2e-16
							speciesrattus	0.027134	0.001435	18.91	<2e-16
							intercept		region		species		hostsex		loghostweight		logarea
HO-C	df	logLik	AICc	ΔAICc	ω	k	E	P-value	E	P-value	E	P-value	E	P-value	E	P-value	E	P-value
	4	307.031	-605.6	0	0.322	2	1.10873	<2e-16			0.0280952	<2e-16					-0.001048	0.137
	2	305.878	-605.5	0.11	0.304	1	1.10585	<2e-16			0.028056	<2e-16
	5	307.743	-604.8	0.82	0.214	3	1.10842	<2e-16			0.0275706	<2e-16	0.0021089	0.245			-0.001167	0.101
	4	306.325	-604.2	1.41	0.159	2	1.10842	<2e-16			0.027635	<2e-16	0.001677	0.354
							Factor	E	SE	t-value	P-value
							(Intercept)	1.10873	0.0022829	485.668	<2e-16
							logarea	-0.001048	0.0006975	-1.502	0.137
							speciesrattus	0.0280952	0.0017137	16.394	<2e-16
							intercept		region		species		hostsex		loghostweight		distedge
HO-D	df	logLik	AICc	ΔAICc	ω	k	E	P-value	E	P-value	E	P-value	E	P-value	E	P-value	E	P-value
	2	305.878	-605.5	0	0.378	1	1.10585	<2e-16			0.028056	<2e-16
	4	306.579	-604.7	0.79	0.255	2	1.10883	<2e-16			0.0279625	<2e-16					-0.0003767	0.246
	4	306.325	-604.2	1.3	0.198	3	1.10534	<2e-16			0.027635	<2e-16	0.001677	0.354
	4	307.298	-603.9	1.6	0.17	2	1.10875	<2e-16			0.0274067	<2e-16					-0.0004487	0.174
							Factor	E	SE	t-value	P-value
							(Intercept)	1.10585	0.001247	886.75	<2e-16
							speciesrattus	0.028056	0.001726	16.26	<2e-16
							intercept		region		species		hostsex		loghostweight		edgepercent		distCONT
HO-E	df	logLik	AICc	ΔAICc	ω	k	E	P-value	E	P-value	E	P-value	E	P-value	E	P-value	E	P-value	E	P-value
	3	307.046	-605.6	0	0.166	2	1.109	<2e-16			0.02778	<2e-16							-0.0001078	0.134
	3	307.015	-605.6	0.06	0.161	2	1.09782	<2e-16			0.027984	<2e-16					0.01	0.139
	2	305.878	-605.5	0.15	0.154	1	1.10585	<2e-16			0.028056	<2e-16
	5	307.884	-605.1	0.57	0.125	3	1.102	<2e-16			0.02776	<2e-16					0.008598	0.207	-9.319e-05	0.199
	4	307.756	-604.8	0.82	0.11	3	1.096	<2e-16			0.027434	<2e-16	0.002155	0.2356			0.011285	0.0992
	4	306.325	-604.2	1.44	0.081	2	1.10534	<2e-16			0.027635	<2e-16	0.001677	0.354
	5	307.346	-604	1.64	0.073	3	1.10844	<2e-16			0.0274572	<2e-16	0.0013674	0.45					-0.0001012	0.164
	6	308.423	-603.8	1.79	0.068	4	1.10111	<2e-16			0.02731	<2e-16	0.001844	0.315			0.009865	0.155	-8.202e-05	0.263
	4	307.19	-603.7	1.96	0.062	3	1.10984	<2e-16	-0.001336	0.601	0.0280292	<2e-16							-0.0001301	0.122
							Factor	E	SE	t-value	P-value
							(Intercept)	1.109	0.002455	451.685	<2e-16
							speciesrattus	0.02778	0.001723	16.128	<2e-16
							sqrtdistCONT	-0.0001078	7.128e-05	-1.513	0.134
							intercept		region		species		hostsex		loghostweight		logarea
HE-A	df	logLik	AICc	ΔAICc	ω	k	E	P-value	E	P-value	E	P-value	E	P-value	E	P-value	E	P-value
	4	476.727	-942.9	0	0.304	3	1.11989	2e-16	0.0085087	1.71e-13	0.0196895	2e-16	0.0015786	0.103
	3	475.35	-942.4	0.58	0.228	2	1.12036	2e-16	0.0084467	2.98e-13	0.0200879	2e-16
	5	477.413	-942.1	0.84	0.2	3	1.11921	2e-16	0.0083599	5.14e-13	0.0196973	2e-16					0.0001536	0.252
	5	476.031	-941.5	1.39	0.152	3	1.11968	2e-16	0.008297	8.9e-13	0.0200943	2e-16					0.0001547	0.252
	6	476.869	-941	1.93	0.116	3	1.11915	2e-16	0.0084463	3.8e-13	0.019774	2e-16	0.001499	0.128	0.0018676	0.603
							Factor	E	SE	t-value	P-value
							(Intercept)	1.11989	0.0007599	1473.82	2e-16
							hostsexM	0.0015786	0.0009618	1.641	0.103
							regionMARI	0.0085087	0.001023	8.317	1.71e-13
							speciesrattus	0.0196895	0.00097	20.298	2e-16
							intercept		region		species		hostsex		loghostweight		logdistedge		category
HE-B	df	logLik	AICc	ΔAICc	ω	k	E	P-value	E	P-value	E	P-value	E	P-value	E	P-value	E	P-value	E	P-value
	6	478.359	-944	0	0.282	4	1.12144	2e-16	0.0078898	2.65e-11	0.0197509	2e-16	0.0016321	0.0896					-0.0019393	0.0774
	4	476.851	-943.2	0.8	0.189	3	1.12188	2e-16	0.0078445	4.26e-11	0.0201605	2e-16							-0.0018807	0.0891
	4	476.727	-942.9	1.05	0.167	3	1.11989	2e-16	0.0085087	1.71e-13	0.0196895	2e-16	0.0015786	0.103
	6	478.672	-942.4	1.62	0.125	5	1.12372	2e-16	0.0079085	2.7e-11	0.0197481	2e-16	0.0016967	0.0794			-0.0004101	0.4413	-0.0026288	0.0646
	3	475.35	-942.4	1.63	0.125	2	1.12036	2e-16	0.0084467	2.98e-13	0.0200879	2e-16
	6	478.56	-942.1	1.85	0.112	2	1.12036	2e-16	0.0084467	2.98e-13	0.0200879	2e-16
							Factor	E	SE	t-value	P-value
							(Intercept)	1.12144	0.0011508	974.479	2e-16
							category2frag	-0.0019393	0.0010887	-1.781	0.0774
							hostsexM	0.0016321	0.0009536	1.711	0.0896
							regionMARI	0.0078898	0.0010717	7.362	2.65e-11
							speciesrattus	0.0197509	0.0009619	20.533	2e-16
							intercept		region		species		hostsex		loghostweight		logarea
HE-C	df	logLik	AICc	ΔAICc	ω	k	E	P-value	E	P-value	E	P-value	E	P-value	E	P-value	E	P-value
	3	368.86	-729.2	0	0.318	2	1.11901	2e-16	0.0058737	7.05e-07	0.0228471	2e-16
	5	369.589	-728.5	0.79	0.214	3	1.12019	2e-16	0.0056738	1.85e-06	0.022908	2e-16					-0.0004196	0.239
	5	369.45	-728.2	1.06	0.187	3	1.11872	2e-16	0.0059088	6.26e-07	0.0225993	2e-16	0.0009563	0.29
	5	370.41	-727.8	1.44	0.154	4	1.12002	2e-16	0.0056851	1.69e-06	0.0226244	2e-16	0.0011294	0.214			-0.0004828	0.179
	4	369.064	-727.4	1.84	0.127	3	1.11815	2e-16	0.0057546	1.66e-06	0.0229068	2e-16			0.0021339	0.534
							Factor	E	SE	t-value	P-value
							(Intercept)	1.11901	0.0006313	1772.62	2e-16
							regionMARI	0.0058737	0.001098	5.349	7.05e-07
							speciesrattus	0.0228471	0.0008971	25.468	2e-16
							intercept		region		species		hostsex		loghostweight		distedge
HE-D	df	logLik	AICc	ΔAICc	ω	k	E	P-value	E	P-value	E	P-value	E	P-value	E	P-value	E	P-value
	3	368.86	-729.2	0	0.417	2	1.11901	2e-16	0.0058737	7.05e-07	0.0228471	2e-16
	5	369.45	-728.2	1.06	0.245	3	1.11872	2e-16	0.0059088	6.26e-07	0.0225993	2e-16	0.0009563	0.29
	5	369.094	-727.5	1.78	0.172	3	1.11815	2e-16	0.0058957	7.18e-07	0.0228691	2e-16					0.0001085	0.505
	4	369.064	-727.4	1.84	0.166	3	1.11815	2e-16	0.0057546	1.66e-06	0.0229068	2e-16			0.0021339	0.534
							Factor	E	SE	t-value	P-value
							(Intercept)	1772.62	0.0006313	1772.62	2e-16
							regionMARI	5.349	0.001098	5.349	7.05e-07
							speciesrattus	25.468	0.0008971	25.468	2e-16
							intercept		region		species		hostsex		loghostweight		edgepercent		distCONT
	df	logLik	AICc	ΔAICc	ω	k	E	P-value	E	P-value	E	P-value	E	P-value	E	P-value	E	P-value	E	P-value
HE-E	3	368.86	-729.2	0	0.503	2	1.11901	2e-16	0.0058737	7.05e-07	0.0228471	2e-16
	5	369.45	-728.2	1.06	0.296	3	1.11872	2e-16	0.0059088	6.26e-07	0.0225993	2e-16	0.0009563	0.29
	4	369.064	-727.4	1.84	0.201	3	1.11815	2e-16	0.0057546	1.66e-06	0.0229068	2e-16			0.0021339	0.534
							Factor	E	SE	t-value	P-value
							(Intercept)	1.11901	0.0006313	1772.62	2e-16
							regionMARI	0.0058737	0.001098	5.349	7.05e-07
							speciesrattus	0.0228471	0.0008971	25.468	2e-16

## Sheet: Rattus
							intercept		region		hostsex		loghostweight		logarea
FIS-A	df	logLik	AICc	ΔAICc	ω	k	E	P-value	E	P-value	E	P-value	E	P-value	E	P-value
	2	152.133	-297.9	0	0.392	1	1.03005	<2e-16	0.015976	0.0102
	3	152.935	-297.2	0.67	0.281	2	1.0194	<2e-16	0.015579	0.012			0.027959	0.218
	4	152.409	-296.2	1.72	0.166	2	1.03266	<2e-16	0.015279	0.0154	-0.004352	0.4697
	5	153.551	-296.1	1.79	0.161	3	1.02099	<2e-16	0.014432	0.0212	-0.006611	0.2844	0.034212	0.1449
							Factor	E	SE	t-value	P-value
							(Intercept)	1.03005	0.003742	275.299	<2e-16
							regionMARI	0.015976	0.006033	2.648	0.0102
							intercept		region		hostsex		loghostweight		logdistedge		category
FIS-B	df	logLik	AICc	ΔAICc	ω	k	E	P-value	E	P-value	E	P-value	E	P-value	E	P-value	E	P-value
	2	152.133	-297.9	0	0.334	1	1.03005	<2e-16	0.015976	0.0102
	3	152.935	-297.2	0.67	0.239	2	1.0194	<2e-16	0.015579	0.012			0.027959	0.218
	3	152.47	-296.3	1.6	0.15	2	1.0218	<2e-16	0.015134	0.0165					0.001926	0.4243
	4	152.409	-296.2	1.72	0.141	2	1.03266	<2e-16	0.015279	0.0154	-0.004352	0.4697
	5	153.551	-296.1	1.79	0.136	3	1.02099	<2e-16	0.014432	0.0212	-0.006611	0.2844	0.034212	0.1449
							Factor	E	SE	t-value	P-value
							(Intercept)	1.03005	0.003742	275.299	<2e-16
							regionMARI	0.015976	0.006033	2.648	0.0102
							intercept		region		hostsex		loghostweight		logarea
FIS-C	df	logLik	AICc	ΔAICc	ω	k	E	P-value	E	P-value	E	P-value	E	P-value	E	P-value
	3	106.512	-206.5	0	0.183	2	1.0314	<2e-16	0.012339	0.131
	2	105.309	-206.3	0.12	0.172	1	1.03534	<2e-16
	2	106.373	-206.2	0.28	0.159	1	1.01801	<2e-16					0.044	0.156
	4	107.337	-205.7	0.74	0.126	2	1.01965	<2e-16			-0.010481	0.1815	0.054553	0.0872
	4	107.325	-205.7	0.77	0.125	2	1.01691	<2e-16	0.010873	0.184			0.037981	0.22
	2	105.757	-205	1.51	0.086	1	1.03927	<2e-16			-0.007113	0.357
	4	106.822	-204.7	1.77	0.075	2	1.03486	<2e-16	0.0116	0.16	-0.005817	0.449
	4	108.046	-204.6	1.84	0.073	3	1.01848	<2e-16	0.009343	0.257	-0.009028	0.253	0.047919	0.137
							Factor	E	SE	t-value	P-value
							(Intercept)	1.0314	0.004533	227.513	<2e-16
							regionMARI	0.012339	0.008025	1.538	0.131
							intercept		region		hostsex		loghostweight		distedge
FIS-D	df	logLik	AICc	ΔAICc	ω	k	E	P-value	E	P-value	E	P-value	E	P-value	E	P-value
	3	106.512	-206.5	0	0.139	1	1.0314	<2e-16	0.012339	0.131
	2	105.309	-206.3	0.12	0.131	0	1.03534	<2e-16
	2	106.373	-206.2	0.28	0.121	1	1.01801	<2e-16					0.044	0.156
	4	107.337	-205.7	0.74	0.096	2	1.01965	<2e-16			-0.010481	0.1815	0.054553	0.0872
	4	107.325	-205.7	0.77	0.094	2	1.01691	<2e-16	0.010873	0.184			0.037981	0.22
	4	107.067	-205.2	1.29	0.073	2	1.01995	<2e-16	0.01312	0.111					0.001463	0.311
	2	105.757	-205	1.51	0.065	1	1.03927	<2e-16			-0.007113	0.357
	2	105.691	-204.8	1.64	0.061	1	1.02582	<2e-16							0.001243	0.395
	4	106.822	-204.7	1.77	0.057	2	1.03486	<2e-16	0.0116	0.16	-0.005817	0.449
	5	108.051	-204.6	1.83	0.056	3	1.00754	<2e-16			-0.012296	0.1247	0.055695	0.0802	0.001655	0.2557
	4	108.046	-204.6	1.84	0.055	3	1.01848	<2e-16	0.009343	0.257	-0.009028	0.253	0.047919	0.137
	4	106.748	-204.5	1.92	0.053	2	1.00899	<2e-16					0.0435	0.162	0.001203	0.405
							Factor	E	SE	t-value	P-value
							(Intercept)	1.0314	0.004533	227.513	<2e-16
							regionMARI	0.012339	0.008025	1.538	0.131
							intercept		region		hostsex		loghostweight		edgepercent		distCONT
FIS-E	df	logLik	AICc	ΔAICc	ω	k	E	P-value	E	P-value	E	P-value	E	P-value	E	P-value	E	P-value
	3	106.512	-206.5	0	0.17	1	1.0314	<2e-16	0.012339	0.131
	2	105.309	-206.3	0.12	0.16	0	1.03534	<2e-16
	2	106.373	-206.2	0.28	0.148	1	1.01801	<2e-16					0.044	0.156
	4	107.337	-205.7	0.74	0.117	2	1.01965	<2e-16			-0.010481	0.1815	0.054553	0.0872
	4	107.325	-205.7	0.77	0.116	2	1.01691	<2e-16	0.010873	0.184			0.037981	0.22
	2	105.757	-205	1.51	0.08	1	1.03927	<2e-16			-0.007113	0.357
	3	106.845	-204.7	1.73	0.072	2	1.022	<2e-16	0.0168664	0.0949							0.0002924	0.4327
	4	106.822	-204.7	1.77	0.07	2	1.03486	<2e-16	0.0116	0.16	-0.005817	0.449
	4	108.046	-204.6	1.84	0.068	3	1.01848	<2e-16	0.009343	0.257	-0.009028	0.253	0.047919	0.137
							Factor	E	SE	t-value	P-value
							(Intercept)	1.0314	0.004533	227.513	<2e-16
							regionMARI	0.012339	0.008025	1.538	0.131
							intercept		region		hostsex		loghostweight		logarea
HO-A	df	logLik	AICc	ΔAICc	ω	k	E	P-value	E	P-value	E	P-value	E	P-value	E	P-value
	2	230.1	-453.8	0	0.481	1	1.13549	<2e-16	-0.004793	0.0105
	3	230.82	-453	0.83	0.317	2	1.13853	<2e-16	-0.00468	0.0123			-0.007983	0.2433
	3	230.372	-452.1	1.73	0.202	2	1.13471	<2e-16	-0.004585	0.0158	0.0013	0.4735
							Factor	E	SE	t-value	P-value
							(Intercept)	1.13549	0.001127	1007.09	<2e-16
							regionMARI	-0.004793	0.001818	-2.637	0.0105
							intercept		region		hostsex		loghostweight		logdistedge		category
HO-B	df	logLik	AICc	ΔAICc	ω	k	E	P-value	E	P-value	E	P-value	E	P-value	E	P-value	E	P-value
	2	230.1	-453.8	0	0.394	1	1.13549	<2e-16	-0.004793	0.0105
	3	230.82	-453	0.83	0.26	2	1.13853	<2e-16	-0.00468	0.0123			-0.007983	0.2433
	3	230.454	-452.2	1.56	0.18	2	1.13803	<2e-16	-0.0045333	0.0171					-0.0005948	0.4129
	3	230.372	-452.1	1.73	0.166	2	1.13471	<2e-16	-0.004585	0.0158	0.0013	0.4735
							Factor	E	SE	t-value	P-value
							(Intercept)	1.13549	0.001127	1007.09	<2e-16
							regionMARI	-0.004793	0.001818	-2.637	0.0105
							intercept		region		hostsex		loghostweight		logarea
HO-C	df	logLik	AICc	ΔAICc	ω	k	E	P-value	E	P-value	E	P-value	E	P-value	E	P-value
	2	162.011	-319.7	0	0.18	0	1.1339	<2e-16
	3	163.132	-319.7	0.04	0.176	1	1.13504	<2e-16	-0.003567	0.145
	3	163.114	-319.7	0.08	0.173	1	1.13918	<2e-16					-0.0134	0.148
	4	163.986	-319	0.73	0.125	2	1.1395	<2e-16	-0.003116	0.204			-0.011675	0.208
	4	163.976	-319	0.75	0.124	2	1.13872	<2e-16			0.002967	0.2064	-0.016387	0.0864
	3	162.388	-318.2	1.53	0.084	1	1.13282	<2e-16			0.001955	0.398
	4	163.385	-317.8	1.93	0.069	2	1.1341	<2e-16	-0.003366	0.174	0.001579	0.493
	4	164.627	-317.8	1.96	0.068	3	1.13905	<2e-16	-0.002684	0.278	0.002549	0.282	-0.014482	0.134
							Factor	E	SE	t-value	P-value
							(Intercept)	1.1339	0.001136	998.2	<2e-16
							intercept		region		hostsex		loghostweight		distedge
HO-D	df	logLik	AICc	ΔAICc	ω	k	E	P-value	E	P-value	E	P-value	E	P-value	E	P-value
	2	162.011	-319.7	0	0.137	0	1.1339	<2e-16
	3	163.132	-319.7	0.04	0.134	1	1.13504	<2e-16	-0.003567	0.145
	3	163.114	-319.7	0.08	0.132	1	1.13918	<2e-16					-0.0134	0.148
	4	163.986	-319	0.73	0.095	2	1.1395	<2e-16	-0.003116	0.204			-0.011675	0.208
	4	163.976	-319	0.75	0.094	2	1.13872	<2e-16			0.002967	0.2064	-0.016387	0.0864
	4	163.658	-318.4	1.39	0.069	2	1.13839	<2e-16	-0.0037947	0.124					-0.0004274	0.324
	3	162.388	-318.2	1.53	0.064	1	1.13282	<2e-16			0.001955	0.398
	2	162.377	-318.2	1.55	0.063	1	1.13669	<2e-16							-0.0003638	0.405
	3	163.472	-318	1.76	0.057	2	1.14182	<2e-16					-0.0132539	0.154	-0.0003518	0.415
	5	164.645	-317.8	1.92	0.052	3	1.14223	<2e-16			0.0034935	0.145	-0.0167186	0.08	-0.0004801	0.271
	4	163.385	-317.8	1.93	0.052	2	1.1341	<2e-16	-0.003366	0.174	0.001579	0.493
	4	164.627	-317.8	1.96	0.051	3	1.13905	<2e-16	-0.002684	0.278	0.002549	0.282	-0.014482	0.134
							Factor	E	SE	t-value	P-value
							(Intercept)	1.1339	0.001136	998.2	<2e-16
							intercept		region		hostsex		loghostweight		edgepercent		distCONT
HO-E	df	logLik	AICc	ΔAICc	ω	k	E	P-value	E	P-value	E	P-value	E	P-value	E	P-value	E	P-value
	2	162.011	-319.7	0	0.168	0	1.1339	<2e-16
	3	163.132	-319.7	0.04	0.164	2	1.13504	<2e-16	-0.003567	0.145			-0.0134	0.148
	3	163.114	-319.7	0.08	0.161	0	1.13918	<2e-16
	4	163.986	-319	0.73	0.117	2	1.1395	<2e-16	-0.003116	0.204			-0.011675	0.208
	4	163.976	-319	0.75	0.115	2	1.13872	<2e-16			0.002967	0.2064	-0.016387	0.0864
	3	162.388	-318.2	1.53	0.078	1	1.13282	<2e-16			0.001955	0.398
	4	163.48	-318	1.74	0.07	2	1.138	<2e-16	-0.004955	0.101							-8.968e-05	0.422
	4	163.385	-317.8	1.93	0.064	2	1.1341	<2e-16	-0.003366	0.174	0.001579	0.493
	4	164.627	-317.8	1.96	0.063	3	1.13905	<2e-16	-0.002684	0.278	0.002549	0.282	-0.014482	0.134
							Factor	E	SE	t-value	P-value
							(Intercept)	1.1339	0.001136	998.2	<2e-16
							intercept		region		hostsex		loghostweight		logarea
HE-A	df	logLik	AICc	ΔAICc	ω	k	E	P-value	E	P-value	E	P-value	E	P-value	E	P-value
	2	389.389	-772.4	0	1	1	1.114	<2e-16	-0.0003637	0.0236
							Factor	E	SE	t-value	P-value
							(Intercept)	1.114	9.724e-05	11763.3	<2e-16
							regionMARI	-0.0003637	0.0001568	-2.32	0.0236
							intercept		region		hostsex		loghostweight		logdistedge		category
HE-B	df	logLik	AICc	ΔAICc	ω	k	E	P-value	E	P-value	E	P-value	E	P-value	E	P-value	E	P-value
	2	389.389	-772.4	0	0.69	1	1.144	<2e-16	-0.0003637	0.0236
	3	389.724	-770.8	1.6	0.31	2	1.144	<2e-16	-0.0003419	0.0361					-4.988e-05	0.426
							Factor	E	SE	t-value	P-value
							(Intercept)	1.144	9.724e-05	11763.3	<2e-16
							regionMARI	-0.0003637	0.0001568	-2.32	0.0236
							intercept		region		hostsex		loghostweight		logarea
HE-C	df	logLik	AICc	ΔAICc	ω	k	E	P-value	E	P-value	E	P-value	E	P-value	E	P-value
	2	283.529	-562.8	0	0.375	0	1.14373	<2e-16
	3	284.431	-562.3	0.48	0.295	1	1.1441	<2e-16					-0.0009153	0.191
	3	283.954	-561.3	1.44	0.183	1	1.14379	<2e-16	-0.0001666	0.37
	3	283.73	-560.9	1.88	0.146	1	1.14379	<2e-16			-0.0001078	0.537
							Factor	E	SE	t-value	P-value
							(Intercept)	1.14373	8.56e-05	13361	<2e-16
							intercept		region		hostsex		loghostweight		distedge
HE-D	df	logLik	AICc	ΔAICc	ω	k	E	P-value	E	P-value	E	P-value	E	P-value	E	P-value
	2	283.529	-562.8	0	0.375	0	1.14373	<2e-16
	3	284.431	-562.3	0.48	0.295	1	1.1441	<2e-16					-0.0009153	0.191
	3	283.954	-561.3	1.44	0.183	1	1.14379	<2e-16	-0.0001666	0.37
	3	283.73	-560.9	1.88	0.146	1	1.14379	<2e-16			-0.0001078	0.537
							Factor	E	SE	t-value	P-value
							(Intercept)	1.14373	8.56e-05	13361	<2e-16
							intercept		region		hostsex		loghostweight		edgepercent		distCONT
HE-E	df	logLik	AICc	ΔAICc	ω	k	E	P-value	E	P-value	E	P-value	E	P-value	E	P-value	E	P-value
	2	283.529	-562.8	0	0.375	0	1.14373	<2e-16
	3	284.431	-562.3	0.48	0.295	1	1.1441	<2e-16					-0.0009153	0.191
	3	283.954	-561.3	1.44	0.183	1	1.14379	<2e-16	-0.0001666	0.37
	3	283.73	-560.9	1.88	0.146	1	1.14379	<2e-16			-0.0001078	0.537
							Factor	E	SE	t-value	P-value
							(Intercept)	1.14373	8.56e-05	13361	<2e-16

## Sheet: Eliurus
							intercept		region		hostsex		loghostweight		logarea
FIS-A	df	logLik	AICc	ΔAICc	ω	k	E	P-value	E	P-value	E	P-value	E	P-value	E	P-value
	3	123.336	-240.2	0	0.366	1	1.05611	2e-16	0.03536	0.000471
	4	124.356	-240	0.27	0.319	2	1.04937	2e-16	0.03205	0.00173					0.001603	0.16635
	4	123.726	-238.7	1.53	0.17	2	1.06641	2e-16	0.036899	0.000362			-0.025595	0.392225
	4	124.767	-238.4	1.85	0.145	3	1.05974	2e-16	0.033591	0.00131			-0.025844	0.38361	0.001609	0.16576
							Factor	E	SE	t-value	P-value
							(Intercept)	1.05611	0.00433	243.909	2e-16
							regionMARI	0.03536	0.009519	3.715	0.000471
							intercept		region		hostsex		loghostweight		logdistedge		category
FIS-B	df	logLik	AICc	ΔAICc	ω	k	E	P-value	E	P-value	E	P-value	E	P-value	E	P-value	E	P-value
	3	125.364	-242	0	0.545	2	1.02316	2e-16	0.029069	0.00444					0.00782	0.05094
	3	123.336	-240.2	1.74	0.228	1	1.05611	2e-16	0.03536	0.000471
	5	125.684	-240.2	1.76	0.226	3	1.03292	2e-16	0.030556	0.00354			-0.022468	0.44192	0.00765	0.05733
							Factor	E	SE	t-value	P-value
							(Intercept)	1.02316	0.017043	60.034	2e-16
							logdistEDGE	0.00782	0.003918	1.996	0.05094
							regionMARI	0.029069	0.009797	2.967	0.00444
							intercept		region		hostsex		loghostweight		logarea
FIS-C	df	logLik	AICc	ΔAICc	ω	k	E	P-value	E	P-value	E	P-value	E	P-value	E	P-value
	4	90.583	-172.1	0	0.425	2	1.03301	<2e-16	0.035996	0.0362					0.007714	0.0679
	2	88.768	-170.9	1.19	0.234	1	1.05498	<2e-16	0.027829	0.0995
	1	87.328	-170.4	1.76	0.177	0	1.05757	<2e-16
	5	90.913	-170.2	1.91	0.164	3	1.04385	<2e-16	0.039029	0.0283			-0.027936	0.4415	0.007828	0.0657
							Factor	E	SE	t-value	P-value
							(Intercept)	1.03301	0.012686	81.43	<2e-16
							logarea	0.007714	0.00411	1.877	0.0679
							regionMARI	0.035996	0.016604	2.168	0.0362
							intercept		region		hostsex		loghostweight		distedge
FIS-D	df	logLik	AICc	ΔAICc	ω	k	E	P-value	E	P-value	E	P-value	E	P-value	E	P-value
	2	88.768	-170.9	0	0.309	1	1.05498	<2e-16	0.027829	0.0995
	1	87.328	-170.4	0.57	0.233	0	1.05757	<2e-16
	3	89.447	-169.8	1.08	0.18	2	1.03928	<2e-16	0.026368	0.118					0.002004	0.264
	3	88.117	-169.6	1.3	0.161	1	1.03998	<2e-16							0.002225	0.223
	3	89.022	-169	1.93	0.118	2	1.06518	<2e-16	0.03049	0.0815			-0.02552	0.4948
							Factor	E	SE	t-value	P-value
							(Intercept)	1.05498	0.005035	209.517	<2e-16
							regionMARI	0.027829	0.016509	1.686	0.0995
							intercept		region		hostsex		loghostweight		edgepercent		distCONT
FIS-E	df	logLik	AICc	ΔAICc	ω	k	E	P-value	E	P-value	E	P-value	E	P-value	E	P-value	E	P-value
	4	89.99	-170.9	0	0.32	2	1.03351	<2e-16	0.0387828	0.0349							0.0006874	0.1341
	2	88.768	-170.9	0.01	0.319	1	1.05498	<2e-16	0.027829	0.0995
	1	87.328	-170.4	0.57	0.24	1	1.05757	<2e-16
	3	89.022	-169	1.94	0.121	2	1.06518	<2e-16	0.03049	0.0815			-0.02552	0.4948
							Factor	E	SE	t-value	P-value
							(Intercept)	1.03351	0.0148869	69.424	<2e-16
							regionMARI	0.0387828	0.0177552	2.184	0.0349
							sqrtdistCONT	0.0006874	0.0004495	1.529	0.1341
							intercept		region		hostsex		loghostweight		logarea
HO-A	df	logLik	AICc	ΔAICc	ω	k	E	P-value	E	P-value	E	P-value	E	P-value	E	P-value
	3	203.142	-399.8	0	0.363	1	1.10439	2e-16	0.010249	7.83e-05
	4	204.257	-399.8	0.08	0.349	2	1.10617	2e-16	0.0111227	3.18e-05					-0.0004231	0.148
	4	203.408	-398.1	1.78	0.149	2	1.10224	2e-16	0.009928	0.000167			0.005346	0.479743
	4	204.54	-397.9	1.91	0.139	3	1.104	2e-16	0.0107999	6.87e-05			0.0054115	0.47	-0.0004243	0.148
							Factor	E	SE	t-value	P-value
							(Intercept)	1.10439	0.001094	1009.75	2e-16
							regionMARI	0.010249	0.002405	4.262	7.83e-05
							intercept		region		hostsex		loghostweight		logdistedge		category
HO-B	df	logLik	AICc	ΔAICc	ω	k	E	P-value	E	P-value	E	P-value	E	P-value	E	P-value	E	P-value
	4	205.431	-402.1	0	0.73	2	1.11321	2e-16	0.0119336	1.08e-05					-0.0020939	0.0381
	5	205.634	-400.1	1.99	0.27	3	1.11126	2e-16	0.0116355	2.51e-05			0.004504	0.5403	-0.00206	0.0427
							Factor	E	SE	t-value	P-value
							(Intercept)	1.11321	0.0042857	259.753	2e-16
							logdistEDGE	-0.0020939	0.0009853	-2.125	0.0381
							regionMARI	0.0119336	0.0024635	4.844	1.08e-05
							intercept		region		hostsex		loghostweight		logarea
HO-C	df	logLik	AICc	ΔAICc	ω	k	E	P-value	E	P-value	E	P-value	E	P-value	E	P-value
	4	150.474	-291.9	0	0.665	2	1.11026	<2e-16	0.010605	0.0139					-0.001965	0.0614
	2	148.57	-290.5	1.37	0.335	1	1.10467	<2e-16	0.012685	0.00362
							Factor	E	SE	t-value	P-value
							(Intercept)	1.11026	0.003151	352.367	<2e-16
							logarea	-0.001965	0.001021	-1.925	0.0614	.
							regionMARI	0.010605	0.004124	2.571	0.0139
							intercept		region		hostsex		loghostweight		distedge
HO-D	df	logLik	AICc	ΔAICc	ω	k	E	P-value	E	P-value	E	P-value	E	P-value	E	P-value
	2	148.57	-290.5	0	0.631	1	1.10467	<2e-16	0.012685	0.00362
	3	149.25	-289.4	1.08	0.369	2	1.10858	<2e-16	0.0130492	0.00287					-0.0004992	0.26354
							Factor	E	SE	t-value	P-value
							(Intercept)	1.10467	0.001253	881.44	2e-16
							regionMARI	0.012685	0.004109	3.087	0.00362
							intercept		region		hostsex		loghostweight		edgepercent		distCONT
HO-E	df	logLik	AICc	ΔAICc	ω	k	E	P-value	E	P-value	E	P-value	E	P-value	E	P-value	E	P-value
	2	148.57	-290.5	0	0.513	1	1.10467	<2e-16	0.012685	0.00362
	3	149.737	-290.4	0.1	0.487	2	1.1099	<2e-16	0.0100179	0.0291							-0.0001674	0.143
							Factor	E	SE	t-value	P-value
							(Intercept)	1.10467	0.001253	881.44	<2e-16
							regionMARI	0.012685	0.004109	3.087	0.00362
							intercept		region		hostsex		loghostweight		logarea
HE-A	df	logLik	AICc	ΔAICc	ω	k	E	P-value	E	P-value	E	P-value	E	P-value	E	P-value
	3	351.366	-696.3	0	0.457	1	1.117	<2e-16	0.02269	<2e-16
	4	352.162	-695.6	0.72	0.319	1	1.118	<2e-16	0.02275	<2e-16
	4	351.806	-694.9	1.43	0.224	2	1.11763	<2e-16	0.0227207	<2e-16			-0.0005332	0.363
							Factor	E	SE	t-value	P-value
							(Intercept)	1.117	8.492e-05	13157.7	<2e-16
							regionMARI	0.02269	0.0001867	121.5	<2e-16
							intercept		region		hostsex		loghostweight		logdistedge		category
HE-B	df	logLik	AICc	ΔAICc	ω	k	E	P-value	E	P-value	E	P-value	E	P-value	E	P-value	E	P-value
	4	352.84	-696.9	0	0.443	2	1.118	<2e-16	0.02279	<2e-16					-0.0001314	0.096
	3	351.366	-696.3	0.64	0.322	1	1.117	<2e-16	0.02269	<2e-16
	4	353.404	-695.7	1.27	0.235	3	1.118	<2e-16	0.02283	<2e-16			-0.0005888	0.308	-0.0001358	0.086
							Factor	E	SE	t-value	P-value
							(Intercept)	1.118	0.0003375	3312.72	<2e-16
							logdistEDGE	-0.0001314	7.759e-05	-1.694	0.096
							regionMARI	0.02279	0.000194	117.505	<2e-16
							intercept		region		hostsex		loghostweight		logarea
HE-C	df	logLik	AICc	ΔAICc	ω	k	E	P-value	E	P-value	E	P-value	E	P-value	E	P-value
	4	260.591	-512.1	0	0.459	2	1.118	<2e-16	0.02274	<2e-16					-0.0001309	0.105
	2	259.159	-511.7	0.43	0.371	1	1.117	<2e-16	0.02288	<2e-16
	5	260.88	-510.1	1.99	0.17	3	1.118	<2e-16	0.02279	<2e-16			-0.0005006	0.472	-0.0001289	0.113
							Factor	E	SE	t-value	P-value
							(Intercept)	1.118	0.0002434	4593.13	<2e-16
							logarea	-0.0001309	7.885e-05	-1.66	0.105
							regionMARI	0.02274	0.0003185	71.39	<2e-16
							intercept		region		hostsex		loghostweight		distedge
HE-D	df	logLik	AICc	ΔAICc	ω	k	E	P-value	E	P-value	E	P-value	E	P-value	E	P-value
	2	259.159	-511.7	0	0.561	1	1.117	<2e-16	0.02288	<2e-16
	3	259.474	-509.9	1.81	0.227	2	1.11765	<2e-16	0.022934	<2e-16			-0.0005403	0.447
	3	259.404	-509.8	1.95	0.212	2	1.118	<2e-16	0.02289	<2e-16					-2.299e-05	0.503
							Factor	E	SE	t-value	P-value
							(Intercept)	1.117	9.574e-05	11671.3	<2e-16
							regionMARI	0.02288	0.0003139	72.88	<2e-16
							intercept		region		hostsex		loghostweight		edgepercent		distCONT
HE-E	df	logLik	AICc	ΔAICc	ω	k	E	P-value	E	P-value	E	P-value	E	P-value	E	P-value	E	P-value
	2	259.159	-511.7	0	0.56	1	1.117	<2e-16	0.02288	<2e-16
	3	259.474	-509.9	1.81	0.227	2	1.11765	<2e-16	0.022934	<2e-16			-0.0005403	0.447
	3	259.41	-509.8	1.94	0.213	2	1.118	<2e-16	0.02278	<2e-16							-5.993e-06	0.497
							Factor	E	SE	t-value	P-value
							(Intercept)	1.117	9.574e-05	11671.3	<2e-16
							regionMARI	0.02288	0.0003139	72.88	<2e-16
